# Supplementary material for: Chilean Observation Network De Meteor Radars (CONDOR): multi-static system configuration and wind comparison with co-located lidar
Source: Copernicus journal article supplement (doi:10.5194/amt-18-1091-2025), 2025-03-04
Supplement: Supplementary file 1 [file amt-18-1091-2025-supplement.pdf]

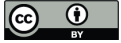

*Supplement of*

## **Chilean Observation Network De Meteor Radars (CONDOR): multi-static system configuration and wind comparison with co-located lidar**

**Zishun Qiao et al.**

*Correspondence to:* Alan Z. Liu (liuz2@erau.edu)

The copyright of individual parts of the supplement might differ from the article licence.

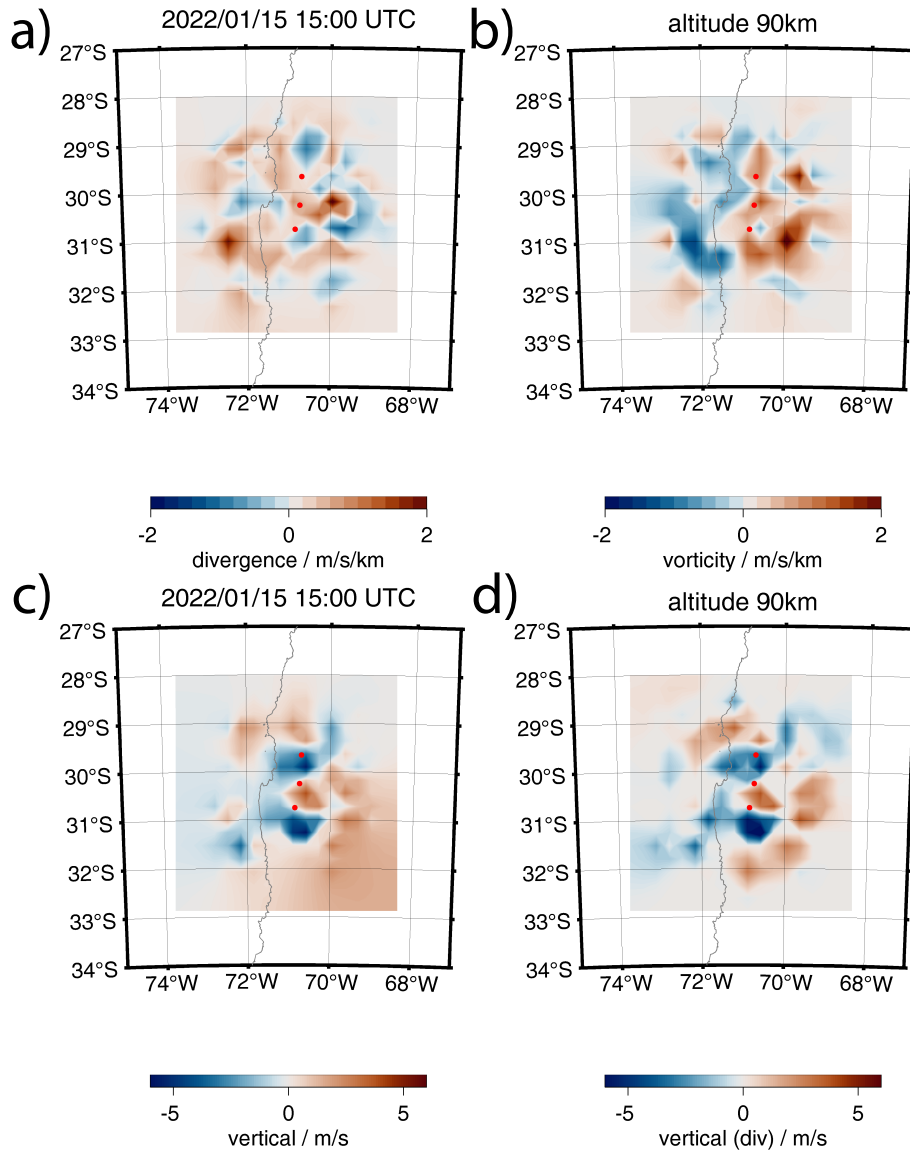

**Figure S1.** (a) Horizontal divergence and (b) relative vorticity, calculated using the 3DVAR+DIV derived horizontal winds on a Cartesian coordinate grid with  $30 \times 30$  km spacing and a temporal resolution of 10 minutes. (c) The compressible–nonstationary solution and (d) the incompressible solution of corresponding vertical wind velocities. The presented snapshot corresponds to the same period as shown in Figure 6.
